# Supplementary material for: Drivers for Rift Valley fever emergence in Mayotte: A Bayesian modelling approach
Source: PubMed Central journal article supplement (PMC5540619; doi:10.1371/journal.pntd.0005767), 2017-07-21
Supplement: pntd.0005767.s001.pdf [file pntd.0005767.s001.pdf]

1 **S1 Text. SI Methods & Results**

2

3 **Drivers for Rift Valley fever emergence in Mayotte:**

4 **a Bayesian modelling approach**

5 Raphaëlle Métras<sup>1\*</sup>, Guillaume Fournié<sup>2</sup>, Laure Dommergues<sup>3</sup>, Anton Camacho<sup>1,4</sup>,

6 Lisa Cavalerie<sup>5,6,7,8</sup>, Philippe Mérot<sup>9</sup>, Matt J Keeling<sup>10,11,12</sup>, Catherine Cêtre-Sossah<sup>5,6</sup>

7 Eric Cardinale<sup>5,6,&</sup> & W John Edmunds<sup>1,&</sup>

8 &These authors contributed equally to this work

9

10

11 **SI Methods**

12 **Natural history of disease and demographics.** The age-stratified SEIR model  
13 diagram is presented in S2 Fig.

14 **Parameters: survival rates using demographic data.** In the absence of disease, the  
15 demographic model is:

16 For the zero-to-one year old animals (i.e. age group  $a=1$ ):

17 
$$N_{1,t+1} = \alpha(1-\delta)N_{1,t} + (1-\alpha)\sum_{a=1}^9 N_{a,t} + (1-\alpha_{10})N_{10,t} \quad (S1)$$

18 For the one to nine years old animals (i.e. age groups  $a \in [2-9]$ ):

19 
$$N_{a,t+1} = \alpha(1-\delta)N_{a,t} + \alpha\delta N_{a-1,t} \quad (S2)$$

20 For animals of 9 years-old and older (i.e. age group  $a=10$ ):

21 
$$N_{10,t+1} = \alpha_{10}N_{10,t} + \alpha\delta N_{9,t} \quad (S3)$$

22

23

24 Age-groups presented in the above equations and S3 Fig were defined as follow:

25 Age-group 1 (a=1): Animals  $\leq$  12 months

26 Age-group 2 (a=2):  $>$  12 months-old to  $\leq$  24 months-old

27 Age-group 3 (a=3):  $>$ 24 months-old to  $\leq$  36 months-old

28 Age-group 4 (a=4):  $>$ 36 months-old to  $\leq$  48 months-old

29 Age-group 5 (a=5):  $>$  48months-old to  $\leq$  60 months-old

30 Age-group 6 (a=6):  $>$ 60 months-old to  $\leq$  72 months-old

31 Age-group 7 (a=7):  $>$  72 months-old to  $\leq$  84 months-old

32 Age-group 8 (a=8):  $>$  84 months-old to  $\leq$  96 months-old

33 Age-group 9 (a=9):  $>$  96 months-old to  $\leq$  108 months-old

34 Age-group 10 (a=10):  $>$  108 months-old

35

36 Where  $\delta$  is the weekly ageing factor (S1 Table), and  $\alpha$  and  $\alpha_{10}$  are the survival rates  
37 for age groups 1 to 9 and age-group 10, respectively.  $N_a$  is the number of animals in  
38 each age group ( $a \in [1-10]$ ) (S3 Fig - with the number of small ruminants and cattle in  
39 each age group being summed up), and the population size  $N$  is equal to 30,000 and  
40 assumed constant:

41 
$$N = \sum_{a=1}^{10} N_a \quad (S4)$$

42 At the stable equilibrium, the number  $\bar{N}_a$  of animals in each age group  $a$  can be  
43 expressed as a function of the population size  $N$ ,  $\delta$ ,  $\alpha$  and  $\alpha_{10}$ :

44 
$$\bar{N}_1 = \frac{N}{\theta} \quad \text{with } \theta = 1 + \sum_{x=1}^8 \left[ \frac{\delta\alpha}{1-(1-\delta)\alpha} \right]^x + \left[ \frac{\delta\alpha}{1-\alpha_{10}} \right] \left[ \frac{\delta\alpha}{1-(1-\delta)\alpha} \right]^8 \quad (S5)$$

45 
$$\bar{N}_{10} = \left[ \frac{\delta\alpha}{1-\alpha_{10}} \right] \left[ \frac{\delta\alpha}{1-(1-\delta)\alpha} \right]^8 \frac{N}{\theta} \quad (\text{S6})$$

46 And for  $a \in [2-9]$ :

47 
$$\bar{N}_a = \left[ \frac{\delta\alpha}{1-(1-\delta)\alpha} \right]^{a-1} \frac{N}{\theta} \quad (\text{S7})$$

48

49  $N$  and  $\delta$  are fixed,  $N=30,000$  and  $\delta=0.021$ , and the parameters  $\alpha$  and  $\alpha_{10}$  are estimated

50 by maximising a Poisson likelihood function: the observed number of animals  $n_a$  in

51 each age-group  $a$  follows a Poisson distribution of mean  $\bar{N}_a$ ,  $n_a \sim \text{Poisson}(\bar{N}_a)$ , and

52 the likelihood function is expressed as:

53 
$$L = \prod_a \frac{\bar{N}_a^{n_a} e^{-\bar{N}_a}}{n_a!} \quad (\text{S8})$$

54 The estimated values of  $\alpha$  and  $\alpha_{10}$  are shown in S1 Table. The reported  $n_a$  and

55 simulated number of animals at equilibrium  $\bar{N}_a$  of animals in each age category are

56 both shown in S3 Fig.

57

58 **Parameters.** S2 Table shows the results if the IgM testing on imported animals

59 caught in 2008.

60

61 **Model fitting and parameter estimation.** Parameter estimation was done by fitting

62 the age-specific simulated proportion of immune animals  $p_{a,i}$ , for each

63 epidemiological year  $i$ , to RVF serological data (Oct 2004-Jun 2016), as presented in

64 Metras et al. 2016 [25], such as (black dots on Fig 3A-H and S6A-H Fig):

65 
$$p_{a,i} = R_{a,i}/N_a, a \text{ in } [1, 10] \quad (\text{S9})$$

66

67 Note however that for Oct 2004-Jun 2008, serological data were only available for the  
 68 whole population so we aggregated model outputs by month (blue dots on Fig 2, S4  
 69 Fig, and S5 Fig):

$$70 \quad p_i = \sum_{a=1}^{10} p_{a,i} \quad (\text{S10})$$

71 We sampled from the posterior distribution of all six parameters  
 72  $\theta = \{imm\_t0, a, b, t_{imp}, P, p_{seized}\}$  using a Monte Carlo Markov Chain Metropolis-Hastings  
 73 (MCMC-MH) algorithm [49]. For all parameters, we assumed uniform priors (Table  
 74 1). The number of IgG positive animals  $x_{a,i}$  among the  $n_{a,i}$  tested animals in the age-  
 75 group  $a$  during period  $i$  followed a binomial distribution;

$$76 \quad x_{a,i} \sim Bin(n_{a,i}, p_{a,i}) \quad (\text{S11})$$

77 The log-likelihood of the data was therefore given by:

$$78 \quad l(data|\theta) = \sum_i \sum_a l_{a,i}(x_{a,i}, n_{a,i} | \theta) \quad (\text{S12})$$

$$79 \quad l_{a,i}(x_{a,i}, n_{a,i} | \theta) = x_{a,i} \log p_{a,i} + (n_{a,i} - x_{a,i}) \log(1 - p_{a,i}) \quad (\text{S13})$$

80 We ran two independent MCMC-MH chains of 100,000 iterations, and visually  
 81 checked that both chains converged to the same stationary distribution. We discarded  
 82 the first 5,000 iterations of the burn-in periods and thinned at a ratio of 1:20 to  
 83 eliminate auto-correlation (S10A-F Fig), finally we combined both chains. The  
 84 median, 95% Credible Interval (CrI) and interquartile range (IQR) of the posterior  
 85 distributions were computed (Table 3). The best model among the two had the lowest  
 86 deviance information criterion value (DIC) [50]:

$$87 \quad DIC = D(\theta_m) + 2p_D \quad (\text{S14})$$

$$88 \quad D(\theta) = -2l(data|\theta) + k \quad (\text{S15})$$

$$89 \quad p_D = \frac{1}{2} \text{var}(D(\theta)) \quad (\text{S16})$$

90 Where  $D(\theta)$  is the deviance of the model for a parameter set  $\theta$ ,  $l(data|\theta)$  is the  
91 likelihood of the data given  $\theta$ , and  $k$  is a constant that cancel out when comparing  
92 models;  $\theta_m$  is the posterior mean of  $\theta$  and  $p_D$  is the effective number of model  
93 parameters, computed as half the variance of the deviance under the posterior.

94

## 95 **SI Results**

96 S4 Fig shows the fit of both linear and exponential models with no import at all over  
97 the study period (models 2a and 2b), and of model 3 with NDVI not tied to  
98 transmission. S7 Fig presents the resulting relationships between NDVI and  $R_s$  for  
99 both the exponential and linear models. Both fits yielded very similar results (S5 Fig  
100 and S6A-H Fig compared with Fig 2 and Fig 3A-H). Finally, the Forecasts 2-5 and  
101 Forecasts 7-10 of the different scenarios of infectious animal imports (1, 10, 20, 30  
102 infectious animals introduced in October 2016 and April 2017) are presented in S8A-  
103 D Fig and S9A-D Fig. S10A-F Fig presents the autocorrelation plots for the 6  
104 parameters of a MCMC chain for Model 1b.
