# Supplementary material for: Drivers for Rift Valley fever emergence in Mayotte: A Bayesian modelling approach
Source: PubMed Central journal article supplement (PMC5540619; doi:10.1371/journal.pntd.0005767), 2017-07-21
Supplement: pntd.0005767.s012.pdf [file pntd.0005767.s012.pdf]

1 **Table S1** Demographic parameters estimated in Equations S1-S8 and used in the

2 SEIR model

| <b>Notation</b> | <b>Parameter description</b>                  | <b>Values</b> | <b>Source</b>           |
|-----------------|-----------------------------------------------|---------------|-------------------------|
| $N$             | Total population size                         | 30,000        | Ref [29]                |
| $N_a$           | Number of animals per age group $a$           | See Fig S3    | Ref [47,48]             |
| $\bar{N}_a$     | Number of estimated animals per age group $a$ | See Fig S3    | Estimated               |
| $\delta$        | Weekly ageing factor                          | 0.021 (1/48)  | 1month=4 weeks in model |
| $\alpha_{1-9}$  | Weekly survival rate for age-groups 1 to 9    | 0.9912        | Estimated               |
| $\alpha_{10}$   | Weekly survival rate for age-group 10         | 0.9938        | Estimated               |

3
