# Supplementary material for: Drivers for Rift Valley fever emergence in Mayotte: A Bayesian modelling approach
Source: PubMed Central journal article supplement (PMC5540619; doi:10.1371/journal.pntd.0005767), 2017-07-21
Supplement: pntd.0005767.s013.pdf [file pntd.0005767.s013.pdf]

- 1 **Table S2** Animal illegally entering and seized by the maritime borders in 2008 in
- 2 Mayotte, and results of ELISA IgM testing (Data Veterinary Services, 2008)

| <b>Month</b> | <b>No. seized animals</b> | <b>No animals sampled</b> | <b>No. positive RVF IgM</b> |
|--------------|---------------------------|---------------------------|-----------------------------|
| January      | 3                         | 0                         | 0                           |
| February     | 4                         | 4                         | 4                           |
| March        | 2                         | 2                         | 1                           |
| April        | 20                        | 19                        | 3                           |
| May          | 18                        | 14                        | 2                           |
| June         | -                         | -                         | -                           |
| July         | -                         | -                         | -                           |
| August       | -                         | -                         |                             |
| September    | 7                         | 7                         | 0                           |
| October      | 6                         | 6                         | 1                           |
| November     | 13                        | 5                         | 0                           |
| December     | 18                        | 18                        | 0                           |
| Total        | 90                        | 75                        | 11                          |

- 3
- 4
- 5
- 6
